# Supplementary material for: Association of Performance Status With Survival in Patients With Advanced Non–Small Cell Lung Cancer Treated With Pembrolizumab Monotherapy
Source: PubMed Central journal article supplement (PMC7879233; doi:10.1001/jamanetworkopen.2020.37120), 2021-02-11

## Supplemental Online Content

Sehgal K, Gill RR, Widick P, et al. Association of performance status with survival in patients with advanced non–small cell lung cancer treated with pembrolizumab monotherapy. *JAMA Netw Open*. 2021;4(2):e2037120. doi:10.1001/jamanetworkopen.2020.37120

**eTable 1.** Next-Line Therapies

**eTable 2.** Unadjusted Association Between Baseline Clinicopathologic/Laboratory Characteristics and Patient Outcomes

**eTable 3.** Comparison of Efficacy and Survival Outcomes Reported in Literature on Treatment With Immune Checkpoint Inhibitors in Patients With Advanced NSCLC with ECOG PS of at Least 2

**eTable 4.** Clinicopathologic and Treatment Characteristics of Patients With ECOG PS of at Least 2 With or Without Durable Clinical Benefit

**eTable 5.** Treatment Outcomes in Patients With ECOG PS 0-1 vs ECOG PS2

**eFigure 1.** Univariate Kaplan-Meier Survival Curves for Progression-Free Survival-2 in Patients With Advanced NSCLC and ECOG PS 0-1 vs at Least 2 Treated With Pembrolizumab Monotherapy

**eFigure 2.** Univariate Kaplan-Meier Survival Curves for Progression-Free Survival, Overall Survival, and Progression-Free Survival in Patients With Advanced NSCLC and ECOG PS 0-1 vs 2 Treated With Pembrolizumab Monotherapy

This supplemental material has been provided by the authors to give readers additional information about their work.

**eTable 1.** Next-Line Therapies

| <b>Agents</b>                           | <b>Regimen</b>                           | <b>ECOG PS 0-1<br/>(N = 31)</b> | <b>ECOG PS <math>\geq</math>2<br/>(N = 24)</b> |
|-----------------------------------------|------------------------------------------|---------------------------------|------------------------------------------------|
| <b>Pembrolizumab +<br/>Chemotherapy</b> | Pembrolizumab + Carboplatin + Pemetrexed | 3                               |                                                |
|                                         | Pembrolizumab + Carboplatin + Paclitaxel | 1                               |                                                |
|                                         | Pembrolizumab + Pemetrexed               | 1                               |                                                |
| <b>Chemotherapy</b>                     | Carboplatin + Pemetrexed                 | 2                               |                                                |
|                                         | Carboplatin + Paclitaxel                 | 1                               |                                                |
|                                         | Carboplatin + Gemcitabine                | 1                               |                                                |
|                                         | Docetaxel                                | 2                               |                                                |
| <b>Targeted therapy</b>                 | Osimertinib                              | 1                               | 1                                              |
|                                         | Alectinib                                | 1                               |                                                |
|                                         | Dabrafenib + Trametinib                  |                                 | 1                                              |
| <b>Clinical Trials</b>                  |                                          | 1                               |                                                |
| <b>Total</b>                            |                                          | <b>14</b>                       | <b>2</b>                                       |

**eTable 2.** Unadjusted Association Between Baseline Clinicopathologic/Laboratory Characteristics and Patient Outcomes

|                                                    | <b>Unadjusted HR<br/>for progression<br/>or death<br/>(95% CI)</b> | <b>P value</b> | <b>Unadjusted HR<br/>for death<br/>(95% CI)</b> | <b>P value</b>   |
|----------------------------------------------------|--------------------------------------------------------------------|----------------|-------------------------------------------------|------------------|
| ECOG PS<br>(2-3 versus 0-1)                        | <b>2.24<br/>(1.28 – 3.92)</b>                                      | <b>0.005</b>   | <b>3.59<br/>(1.94 – 6.65)</b>                   | <b>&lt;0.001</b> |
| Age (years)                                        | 1.01<br>(0.98 – 1.04)                                              | 0.42           | 1.03<br>(0.99 – 1.06)                           | 0.09             |
| Sex<br>(Female versus Male)                        | 1.65<br>(0.94 – 2.89)                                              | 0.08           | 1.39<br>(0.78 – 2.49)                           | 0.27             |
| Race (Caucasian versus<br>Non-Caucasian)           | 0.79<br>(0.42 – 1.54)                                              | 0.50           | 0.63<br>(0.31 – 1.27)                           | 0.19             |
| Body mass index                                    | 1.01<br>(0.97 – 1.05)                                              | 0.66           | 1.00<br>(0.95 – 1.05)                           | 0.96             |
| Obese<br>(Yes versus No)                           | 1.36<br>(0.69 – 2.65)                                              | 0.38           | 1.44<br>(0.69 – 3.02)                           | 0.33             |
| Ever smoker,<br>(No versus Yes)                    | 2.84<br>(0.99 – 8.20)                                              | 0.05           | 1.76<br>(0.74 – 4.19)                           | 0.20             |
| Simplified Comorbidity<br>score                    | 0.98<br>(0.89 – 1.08)                                              | 0.67           | 1.03<br>(0.94 – 1.14)                           | 0.48             |
| Hypertension<br>(Yes versus No)                    | 1.08<br>(0.62 – 1.88)                                              | 0.79           | 1.35<br>(0.75 – 2.43)                           | 0.32             |
| Diabetes mellitus<br>(Yes versus No)               | 1.24<br>(0.52 – 2.94)                                              | 0.62           | 1.69<br>(0.78 – 3.68)                           | 0.18             |
| Cardiovascular<br>Comorbidities<br>(Yes versus No) | 0.93<br>(0.53 – 1.63)                                              | 0.80           | 1.25<br>(0.69 – 2.27)                           | 0.46             |
| Respiratory Comorbidities<br>(Yes versus No)       | 0.89<br>(0.49 – 1.59)                                              | 0.69           | 1.10<br>(0.58 – 2.09)                           | 0.76             |
| Creatinine clearance <60<br>(Yes versus No)        | 1.04<br>(0.58 – 1.85)                                              | 0.90           | 1.36<br>(0.74 – 2.47)                           | 0.32             |
| Creatinine clearance <30<br>(Yes versus No)        | 1.52<br>(0.47 – 4.94)                                              | 0.48           | 2.64<br>(0.81 – 8.61)                           | 0.11             |
| VTE<br>(Yes versus No)                             | 0.85<br>(0.41 – 1.76)                                              | 0.67           | 0.87<br>(0.39 – 1.91)                           | 0.73             |
| PD-L1 TPS (%)                                      | 0.99<br>(0.99 – 1.01)                                              | 0.77           | 0.99<br>(0.99 – 1.01)                           | 0.51             |
| Number of metastatic sites                         | 1.14<br>(0.93 – 1.39)                                              | 0.19           | 1.12<br>(0.90 – 1.38)                           | 0.31             |
| Lung/pleura metastases<br>(Yes versus No)          | 0.79<br>(0.45 – 1.39)                                              | 0.42           | 0.72<br>(0.39 – 1.30)                           | 0.27             |
| Lymph node metastases<br>(Yes versus No)           | 1.25<br>(0.71 – 2.17)                                              | 0.44           | 1.09<br>(0.59 – 1.99)                           | 0.78             |
| Brain metastases<br>(Yes versus No)                | 1.05<br>(0.58 – 1.89)                                              | 0.87           | 1.15<br>(0.61 – 2.15)                           | 0.67             |
| Bone metastases<br>(Yes versus No)                 | 1.61<br>(0.92 – 2.83)                                              | 0.09           | 1.41<br>(0.78 – 2.56)                           | 0.26             |
| Liver metastases<br>(Yes versus No)                | 1.81<br>(0.76 – 4.32)                                              | 0.18           | 1.54<br>(0.68 – 3.49)                           | 0.29             |

|                                                         |                                     |             |                                     |              |
|---------------------------------------------------------|-------------------------------------|-------------|-------------------------------------|--------------|
| Adrenal metastases<br>(Yes versus No)                   | 1.26<br>(0.54 – 2.98)               | 0.59        | 1.67<br>(0.70 – 3.97)               | 0.25         |
| Other metastases<br>(Yes versus No)                     | 1.39<br>(0.65 – 2.97)               | 0.39        | 1.44<br>(0.71 – 2.91)               | 0.32         |
| Line of therapy<br>(≥ Second line versus First<br>line) | 1.02<br>(0.55 – 1.89)               | 0.95        | 0.97<br>(0.49 – 1.88)               | 0.92         |
| White blood cell count<br>(K/uL)                        | <b>1.06</b><br><b>(1.01 – 1.12)</b> | <b>0.01</b> | <b>1.08</b><br><b>(1.03 – 1.13)</b> | <b>0.003</b> |
| Absolute neutrophil count<br>(K/uL)                     | <b>1.07</b><br><b>(1.01 – 1.14)</b> | <b>0.02</b> | <b>1.09</b><br><b>(1.03 – 1.17)</b> | <b>0.004</b> |
| Creatinine (mg/dL)                                      | 0.94<br>(0.53 – 1.68)               | 0.84        | 1.22<br>(0.68 – 2.18)               | 0.66         |

Abbreviations: CAD = Coronary artery disease, CHF = Congestive heart failure, CI = Confidence intervals, ECOG PS = Eastern Cooperative Oncology group performance status, HR = Hazard ratio, K/uL = x1000/microliter, NSCLC = Non-small-cell lung cancer, PD-L1 = Programmed death ligand -1, TPS = Tumor proportion score, VTE = Venous thromboembolic disease

**eTable 3.** Comparison of Efficacy and Survival Outcomes Reported in Literature on Treatment With Immune Checkpoint Inhibitors in Patients With Advanced NSCLC with ECOG PS of at Least 2

|                                | Retrospective       |                                        |                          |                          |                           | Prospective Non-randomized |
|--------------------------------|---------------------|----------------------------------------|--------------------------|--------------------------|---------------------------|----------------------------|
|                                | Sehgal <i>et al</i> | Petrillo <i>et al</i>                  | Facchinetti <i>et al</i> | Alessi <i>et al</i>      | Friedlaender <i>et al</i> | Middleton <i>et al</i>     |
| <b>ICI</b>                     | Pembrolizumab       | Nivolumab, Pembrolizumab, Atezolizumab | Pembrolizumab            | Pembrolizumab            | Pembrolizumab             | Pembrolizumab              |
| <b>PS</b>                      | 2 - 3               | 2 - 4                                  | 2                        | 2                        | 2                         | 2                          |
| <b>PD-L1</b>                   | <b>Any</b>          | <b>Any</b>                             |                          |                          |                           | <b>Any</b>                 |
| <b>Line</b>                    | <b>Any</b>          | <b>Any</b>                             |                          |                          |                           | <b>Any</b>                 |
| <b>N</b>                       | 29                  | 84                                     |                          |                          |                           | 60                         |
| <b>ORR, %</b>                  | 17.9 %              | Not reported                           |                          |                          |                           | 27 %                       |
| <b>DCR, %</b>                  | 53.6 %              | Not reported                           |                          |                          |                           | 37 %                       |
| <b>Median PFS, mo (95% CI)</b> | 2.3 (1.8 – 4.8)     | 1.7 (1.3 – 2.1)                        |                          |                          |                           | 4.4 (3.3 – 9.9)            |
| <b>Median OS, mo (95% CI)</b>  | 4.1 (2.1 – 6.9)     | 4.5 (2.3 – 6.9)                        |                          |                          |                           | 9.8 (7.1 – 14.6)           |
| <b>PD-L1</b>                   | <b>Any</b>          | <b>Any</b>                             |                          |                          |                           | <b>Any</b>                 |
| <b>Line</b>                    | <b>First</b>        | <b>First</b>                           |                          |                          |                           | <b>First</b>               |
| <b>N</b>                       | 21                  | 19                                     |                          |                          |                           | 24                         |
| <b>ORR, %</b>                  | 20 %                | Not reported                           |                          |                          |                           | 21 %                       |
| <b>DCR, %</b>                  | 55 %                | Not reported                           |                          |                          |                           | 38 %                       |
| <b>Median PFS, mo (95% CI)</b> | 2.7 (1.8 – 7.6)     | Not reported                           |                          |                          |                           | 4.3 (1.9 – 13.1)           |
| <b>Median OS, mo (95% CI)</b>  | 4.3 (2.3 – 7.8)     | 6.7 (Not reported)                     |                          |                          |                           | 7.9 (2.6 – Not reached)    |
| <b>PD-L1</b>                   | <b>≥ 50%</b>        |                                        |                          |                          |                           | <b>≥ 50%</b>               |
| <b>Line</b>                    | <b>Any</b>          |                                        |                          |                          |                           | <b>Any</b>                 |
| <b>N</b>                       | 17                  |                                        |                          |                          |                           | 15                         |
| <b>ORR, %</b>                  | 25 %                |                                        |                          |                          |                           | 47 %                       |
| <b>DCR, %</b>                  | 43.8 %              |                                        |                          |                          |                           | 53 %                       |
| <b>Median PFS, mo (95% CI)</b> | 2.1 (0.5 – 4.9)     |                                        |                          |                          |                           | 12.6 (1.9 – Not reached)   |
| <b>Median OS, mo (95% CI)</b>  | 2.8 (0.9 – 6.9)     |                                        |                          |                          |                           | 14.6 (4.6 – Not reached)   |
| <b>PD-L1</b>                   | <b>≥ 50%</b>        |                                        | <b>≥ 50%</b>             | <b>≥ 50%</b>             | <b>≥ 50%</b>              |                            |
| <b>Line</b>                    | <b>First</b>        |                                        | <b>First</b>             | <b>First</b>             | <b>First</b>              |                            |
| <b>N</b>                       | 12                  |                                        | 153                      | 39                       | 56                        |                            |
| <b>ORR, %</b>                  | 27.3 %              |                                        | 21 %                     | 25.6 %                   | 45 %                      |                            |
| <b>DCR, %</b>                  | 45.5 %              |                                        | 37 %                     | Not reported             | Not reported              |                            |
| <b>Median PFS, mo (95% CI)</b> | 2.1 (0.5 – 4.9)     |                                        | 2.4 (1.6 – 2.5)          | 4.0 (2.07 – 14.04)       | 2.6 (1.9 – 5.1)           |                            |
| <b>Median OS, mo (95% CI)</b>  | 2.8 (0.5 – 6.9)     |                                        | 3.0 (2.4 – 3.5)          | 7.4 (3.78 – Not reached) | 7.8 (2.5 – 10.7)          |                            |

Abbreviations: ECOG PS = Eastern Cooperative Oncology group performance status, DCR = Disease control rate, mo = months, ORR = Overall response rate, OS = Overall survival, N = Number of patients, NSCLC = Non-small cell lung cancer, PD-L1 = Programmed death ligand-1, PFS = Progression-free survival, TPS = Tumor proportion score

**eTable 4.** Clinicopathologic and Treatment Characteristics of Patients With ECOG PS of at Least 2 With or Without Durable Clinical Benefit

|                                                            |                                                             | <b>Durable Clinical Benefit<br/>(N = 7)</b> | <b>No Durable Clinical Benefit<br/>(N = 22)</b> | <b>P value</b> |
|------------------------------------------------------------|-------------------------------------------------------------|---------------------------------------------|-------------------------------------------------|----------------|
| <b>ECOG PS</b>                                             | 2, n (%)<br>3, n (%)                                        | 6 (85.7)<br>1 (14.3)                        | 19 (86.4)<br>3 (13.6)                           | 1.00           |
| <b>Age, years</b>                                          | Median (range)                                              | 68 (63 – 87)                                | 72.5 (42 – 86)                                  | 0.68           |
| <b>Sex</b>                                                 | Female, n (%)                                               | 3 (42.9)                                    | 11 (50)                                         | 1.00           |
| <b>Race</b>                                                | Caucasian, n (%)<br>African American, n (%)<br>Asian, n (%) | 5 (71.4)<br>2 (28.6)<br>0                   | 16 (72.7)<br>4 (18.2)<br>2 (9.1)                | 0.79           |
| <b>Body Mass Index</b>                                     | Median (range)                                              | 25.3 (19.5 – 37.3)                          | 24.9 (17.3 – 40.9)                              | 0.58           |
| <b>Obesity</b>                                             | Yes, n (%)                                                  | 3 (42.9)                                    | 5 (22.7)                                        | 0.36           |
| <b>Smoking</b>                                             | Ever, n (%)                                                 | 7 (100)                                     | 18 (81.8)                                       | 0.55           |
| <b>Comorbidities</b>                                       | Simplified Comorbidity Score, Median (range)                | 9 (7 – 13)                                  | 9 (2 – 14)                                      | 0.88           |
|                                                            | Hypertension, n (%)                                         | 3 (42.9)                                    | 14 (63.6)                                       | 0.40           |
|                                                            | Diabetes mellitus, n (%)                                    | 0 (0)                                       | 4 (18.2)                                        | 0.55           |
|                                                            | Cardiovascular, n (%)                                       | 3 (42.9)                                    | 6 (27.3)                                        | 0.64           |
|                                                            | Respiratory, n (%)                                          | 4 (57.1)                                    | 8 (36.4)                                        | 0.40           |
|                                                            | Creatinine clearance <60, n (%)                             | 3 (42.9)                                    | 8 (36.4)                                        | 1.00           |
|                                                            | Creatinine clearance <30, n (%)                             | 0 (0)                                       | 1 (4.5)                                         | 1.00           |
| VTE, n (%)                                                 | 1 (14.3)                                                    | 5 (22.7)                                    | 1.00                                            |                |
| <b>Histology</b>                                           | Non-squamous, n (%)                                         | 5 (71.4)                                    | 14 (63.6)                                       | 1.00           |
|                                                            | Squamous, n (%)                                             | 2 (28.6)                                    | 6 (27.3)                                        |                |
|                                                            | Poorly differentiated, n (%)                                | 0                                           | 2 (9.1)                                         |                |
| <b>Driver mutations/<br/>alterations<br/>(N=26 [7/19])</b> | None, n (%)                                                 | 4 (57.1)                                    | 6 (31.6)                                        | 0.38           |
|                                                            | KRAS, n (%)                                                 | 2 (28.6)                                    | 10 (52.6)                                       |                |
|                                                            | EGFR, n (%)                                                 | 1 (14.3)                                    | 1 (5.3)                                         |                |
|                                                            | Others, n (%)                                               | 0                                           | 2 (10.5)                                        |                |
|                                                            | - MET, n (%)                                                | 0                                           | 1 (5.3)                                         |                |
|                                                            | - BRAF, n (%)                                               | 0                                           | 1 (5.3)                                         |                |
|                                                            |                                                             |                                             |                                                 |                |
| <b>PD-L1 TPS</b>                                           | Median (range)                                              | 40 (1 – 100)                                | 70 (1 – 90)                                     | 0.30           |
|                                                            | ≥ 50%, n (%)                                                | 3 (42.9)                                    | 14 (63.6)                                       | 0.40           |
| <b>Sites of metastases</b>                                 | Number, Median (range)                                      | 2 (1 – 4)                                   | 2 (1 – 5)                                       | 0.22           |
|                                                            | Lung/pleura, n (%)                                          | 5 (71.4)                                    | 12 (54.5)                                       | 0.67           |
|                                                            | Lymph node, n (%)                                           | 3 (42.9)                                    | 12 (54.5)                                       | 0.68           |
|                                                            | Brain, n (%)                                                | 1 (14.3)                                    | 8 (36.4)                                        | 0.38           |

|                                         |                      |                    |                    |       |
|-----------------------------------------|----------------------|--------------------|--------------------|-------|
|                                         | Bone, n (%)          | 3 (42.9)           | 13 (59.1)          | 0.67  |
|                                         | Liver, n (%)         | 0 (0)              | 4 (18.2)           | 0.55  |
|                                         | Adrenal, n (%)       | 1 (14.3)           | 3 (13.6)           | 1.00  |
|                                         | Others, n (%)        | 1 (14.3)           | 7 (31.8)           | 0.64  |
| <b>Line of therapy</b>                  | First line, n (%)    | 6 (85.7)           | 15 (68.2)          | 0.64  |
|                                         | ≥ Second line, n (%) | 1 (14.3)           | 7 (31.8)           |       |
| <b>WBC (K/uL)</b>                       | Median (range)       | 7.9 (5.4 – 10.2)   | 8.6 (4.7 – 37.5)   | 0.40  |
| <b>ANC (K/uL)</b>                       | Median (range)       | 5.59 (3.38 – 7.52) | 6.92 (3.51 – 22.4) | 0.25  |
| <b>Creatinine (mg/dL)</b>               | Median (range)       | 0.9 (0.4 – 1.8)    | 0.85 (0.5 – 2.3)   | 0.74  |
| <b>Objective response (N=28 [7/21])</b> | ORR, n (%)           | 4 (57.1)           | 1 (4.8)            | 0.008 |
|                                         | • CR, n (%)          | 0 (0)              | 0 (0)              |       |
|                                         | • PR, n (%)          | 4 (57.1)           | 1 (4.8)            |       |
| <b>Immune-related adverse events</b>    | Any grade, n (%)     | 5 (71.4)           | 4 (18.2)           | 0.02  |
|                                         | ≥ Grade 3, n (%)     | 1 (14.3)           | 4 (18.2)           | 1.00  |
|                                         | Steroid use, n (%)   | 1 (14.3)           | 4 (18.2)           | 1.00  |

Abbreviations: ANC = Absolute neutrophil count, CAD = Coronary artery disease, CHF = Congestive heart failure, CR = Complete response, ECOG PS = Eastern Cooperative Oncology group performance status, K/uL = x1000/microliter, ORR = Overall response rate, PD-L1 = Programmed death ligand 1, PR = Partial response, TPS = Tumor proportion score, VTE = Venous thromboembolic disease, WBC = White blood cell count, wk = weeks



**eTable 5.** Treatment Outcomes in Patients With ECOG PS 0-1 vs ECOG PS2

|                                             |                                  | All<br>(N = 70)   | ECOG PS 0-1<br>(N = 45) | ECOG PS =2<br>(N = 25) | P<br>value |
|---------------------------------------------|----------------------------------|-------------------|-------------------------|------------------------|------------|
| <b>Objective response</b><br>(N=67 [43/24]) | ORR, n (%)                       | 16 (23.9)         | 12 (27.9)               | 4 (16.7)               | 0.38       |
|                                             | • CR, n (%)                      | 2 (2.9)           | 2 (4.6)                 | 0 (0)                  |            |
|                                             | • PR, n (%)                      | 14 (20.9)         | 10 (23.3)               | 4 (16.7)               |            |
| <b>Disease control</b><br>(N=67 [43/24])    | DCR, n (%)                       | 51 (76.1)         | 38 (88.4)               | 13 (54.2)              | 0.003      |
|                                             | • SD, n (%)                      | 35 (52.2)         | 26 (60.5)               | 9 (37.5)               |            |
| <b>Immune-related adverse events</b>        | Any grade, n (%)                 | 32 (45.7)         | 24 (53.3)               | 8 (32)                 | 0.09       |
|                                             | ≥ Grade 3, n (%)                 | 11 (15.7)         | 6 (13.3)                | 5 (20)                 | 0.51       |
|                                             | Steroid use, n (%)               | 15 (21.4)         | 10 (22.2)               | 5 (20)                 | 1.00       |
|                                             | Treatment discontinuation, n (%) | 7 (10)            | 3 (6.7)                 | 4 (16)                 | 0.24       |
|                                             | Death, n (%)                     | 1 (1.4)           | 1 (2.2)                 | 0 (0)                  | 1.00       |
| <b>Progression Free Survival</b>            | Median, months (95% CI)          | 4.9 (3.3 – 7.9)   | 7.9 (4.6 – 15.4)        | 2.3 (1.8 – 4.8)        | 0.003      |
| <b>Progression Free Survival-2</b>          | Median, months (95% CI)          | 8.9 (6.6 – 11.9)  | 11.9 (8.6 – 23.9)       | 4.1 (2.3 – 6.9)        | <0.001     |
| <b>Overall Survival</b>                     | Median, months (95% CI)          | 12.7 (6.7 – 23.2) | 23.2 (14.0 – 35.7)      | 4.1 (2.3 – 6.9)        | <0.001     |
| <b>Death on home hospice</b>                | Yes, n (%)                       | 26 (37.1)         | 15 (33.3)               | 11 (44)                | 0.35       |
|                                             | No, n (%)                        | 14 (20)           | 7 (15.6)                | 7 (28)                 |            |
|                                             | Not known, n (%)                 | 2 (2.9)           | 0 (0)                   | 2 (8)                  |            |
|                                             | Not applicable, n (%)            | 28 (40)           | 23 (51.1)               | 5 (20)                 |            |

Abbreviations: CR = Complete response, DCR = Disease control rate, ECOG PS = Eastern Cooperative Oncology group performance status, ORR = Overall response rate, PR = Partial response, SD = Stable disease

**eFigure 1.** Univariate Kaplan-Meier Survival Curves for Progression-Free Survival-2 in Patients With Advanced NSCLC and ECOG PS 0-1 vs at Least 2 Treated With Pembrolizumab Monotherapy

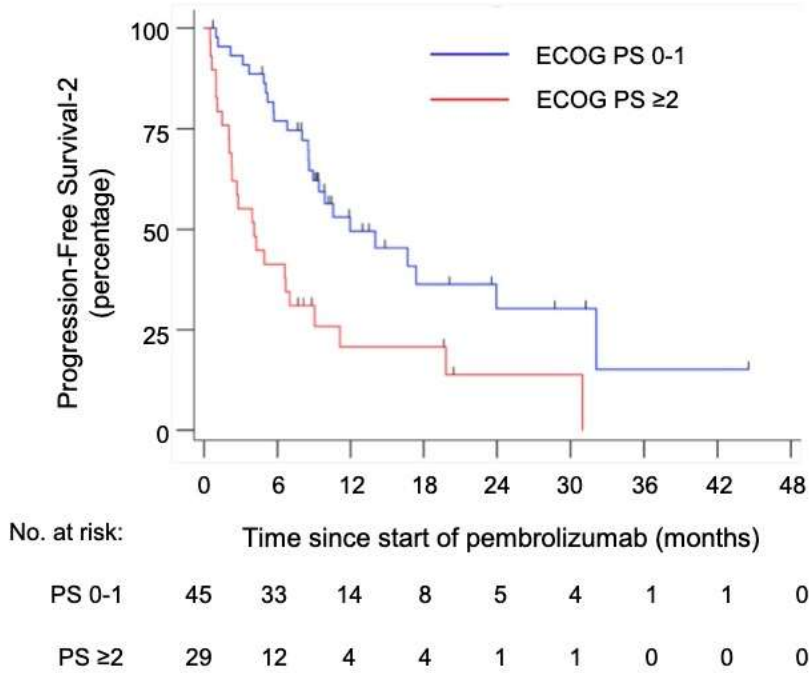

**eFigure 2.** Univariate Kaplan-Meier Survival Curves for Progression-Free Survival, Overall Survival, and Progression-Free Survival in Patients With Advanced NSCLC and ECOG PS 0-1 vs 2 Treated With Pembrolizumab Monotherapy

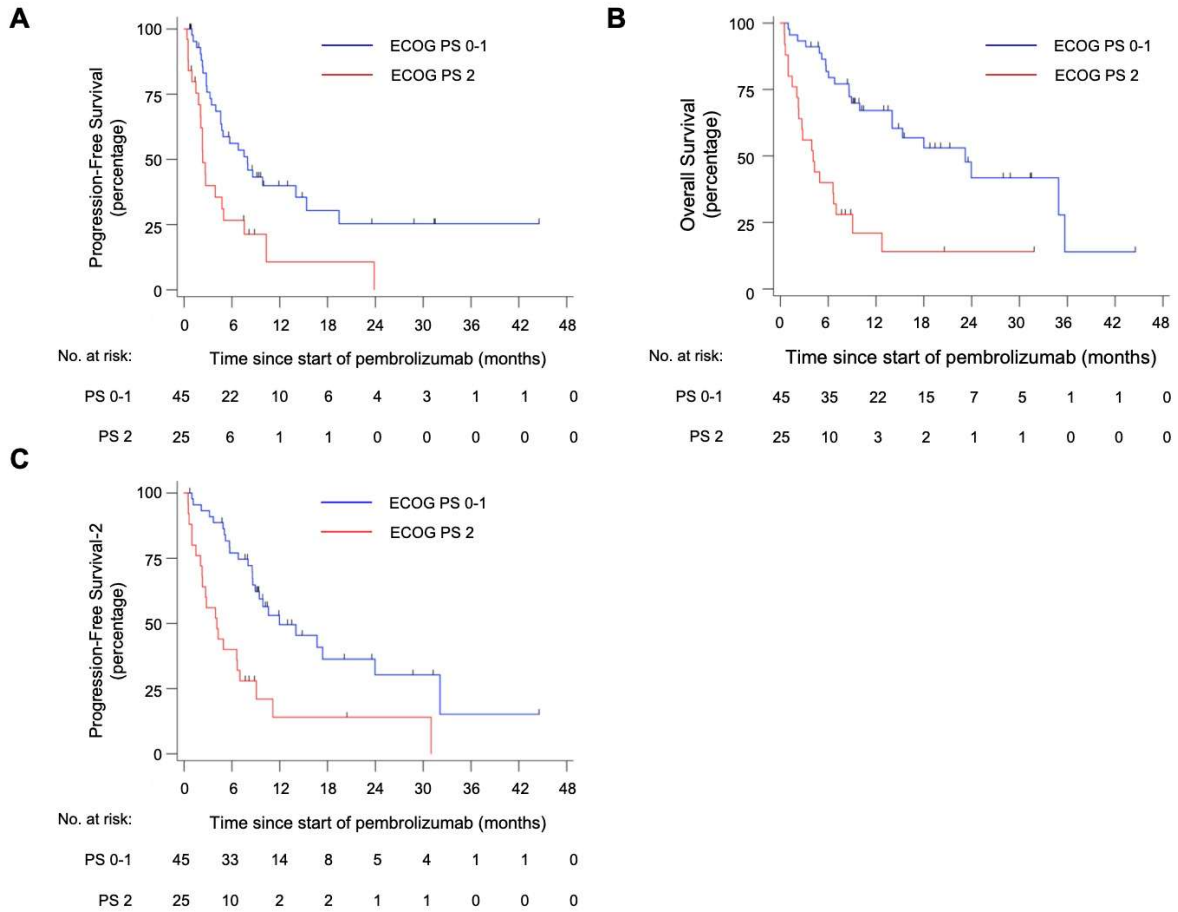

Supplement: jamanetwopen-e2037120-s001.pdf [file jamanetwopen-e2037120-s001.pdf]
